# Supplementary material
Source: PubMed Central journal article supplement (PMC2975052)
Supplement: NIHMS247484-supplement-1.pdf [file NIHMS247484-supplement-1.pdf]

Fig.2a

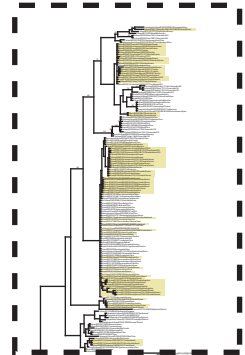

Fig.2b

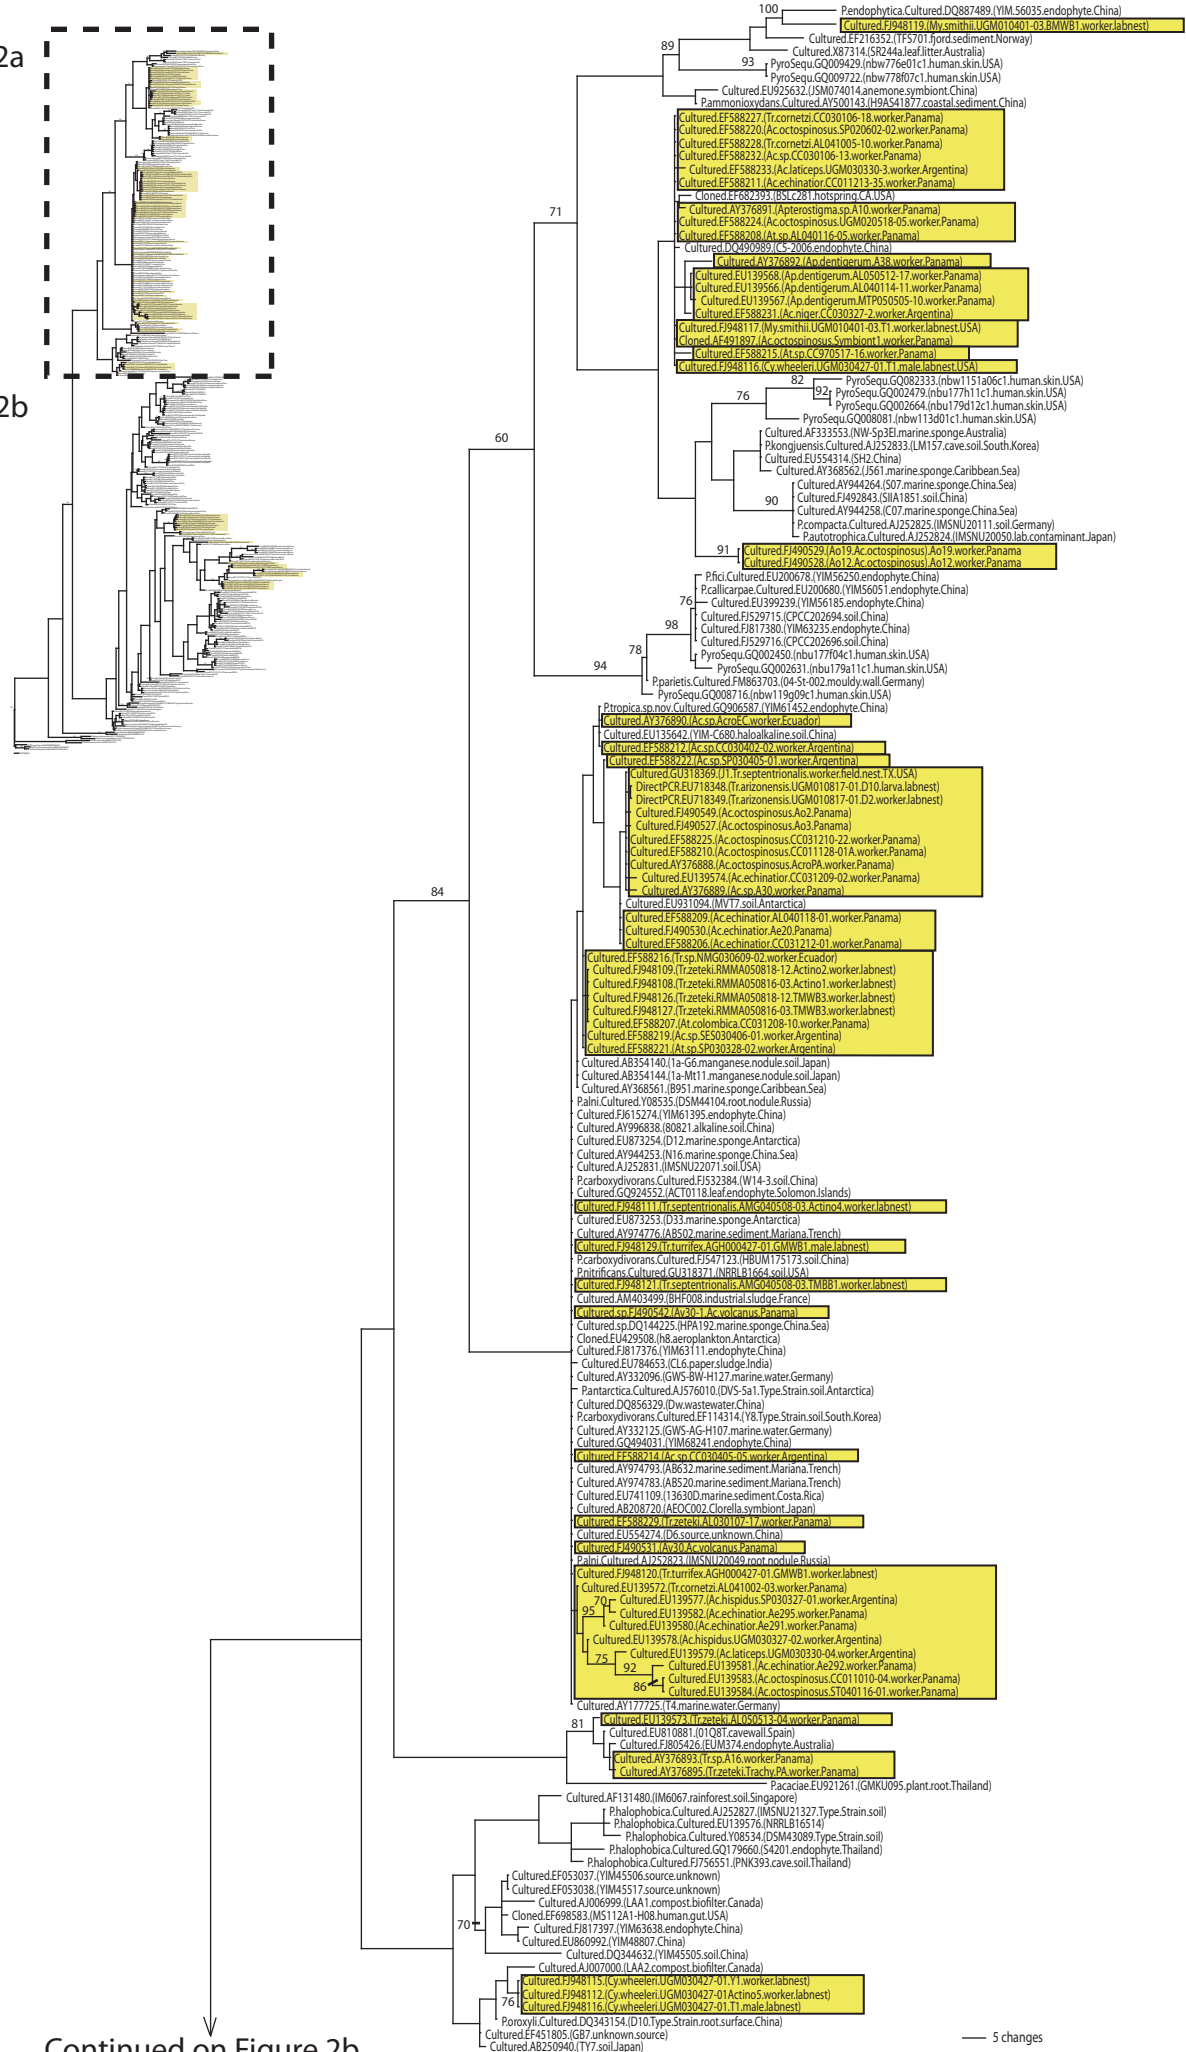

Clade 1  
autotrophic clade

Clade 2

Clade 3  
nitrificans/alni/carboxydivorans clade

Clade 4  
halophobica clade

Continued on Figure 2b

5 changes
